# Supplementary material for: To Achieve an Earlier IFN-γ Response Is Not Sufficient to Control Mycobacterium tuberculosis Infection in Mice
Source: PubMed Central journal article supplement (PMC4069189; doi:10.1371/journal.pone.0100830), 2014-06-24
Supplement: pone.0100830.s001.pdf [file pone.0100830.s001.pdf]

Parameters of the *in silico* model described in Equations (1), (2) and (3) and in Table 3 as well as their description and values.

| Parameter                  | Value                                             | Units                  | Description                                                                              | Source                                             |
|----------------------------|---------------------------------------------------|------------------------|------------------------------------------------------------------------------------------|----------------------------------------------------|
| $\mu$                      | 0.029                                             | $h^{-1}$               | Effective growth rate of bacilli inside mice                                             | Bru&Cardona (2010)<br>Experimental data (see text) |
| $a_{IR}$                   | 500                                               | bacilli per unit of IR | Bacilli that enter non replicative state because of the action of a lymphocyte           | Fitted to experimental data                        |
| $BL_{max}$                 | $2 \times 10^9$                                   | bacilli/mL             | Maximum bacterial load per unit of volume                                                | Estimated from experimental data                   |
| $V_l$                      | 0.50                                              | mL                     | Effective volume of lungs                                                                | Estimated from Treuting et al 2012                 |
| $V_s$                      | 0.75                                              | mL                     | Effective volume of spleen                                                               | Estimated from Treuting et al 2012                 |
| $V_{in}$                   | 0.10                                              | mL                     | Effective volume of lymph nodes                                                          | Estimated from Treuting et al 2012                 |
| $\zeta_{s \rightarrow l}$  | $I_{0.4} \cdot N_{(0,10)}(5,2.5)^{a,b}$           | bacilli                | Bacilli that flow from spleen to lungs                                                   | Random distributed (normal distribution)           |
| $\zeta_{s \rightarrow in}$ | $0.1 \cdot I_{0.4} \cdot N_{(0,10)}(5,2.5)^{a,b}$ | bacilli                | Bacilli that flow from spleen to lymph node                                              | Random distributed (normal distribution)           |
| $\zeta_{l \rightarrow in}$ | $N_{(5,15)}(10,2.5)^b$                            | bacilli                | Bacilli that flow from lungs to lymph node                                               | Random distributed (normal distribution)           |
| $\zeta_{in \rightarrow s}$ | $N_{(5,15)}(10,2.5)^b$                            | bacilli                | Bacilli that flow from lymph node to spleen                                              | Random distributed (normal distribution)           |
| $T_{lyses}$                | Random between 3 and 5                            | days                   | Time interval between the infection of a macrophage and its lyses                        | Lee <i>et al</i> 2006                              |
| $T_{delay}$                | 2.6                                               | days                   | Time between activation of specific immune response in lymphatic organs and its          | Deduced from experimental data (see text)          |
| $\gamma_s$                 | 100                                               | IR units per hour      | Production of specific lymphocytes in spleen during an hour                              | Fitted to experimental data                        |
| $\gamma_{in}$              | 1000                                              | IR units per hour      | Production of specific lymphocytes in lymph node during an hour                          | Fitted to experimental data                        |
| $\omega$                   | 0.23                                              | $h^{-1}$               | Extinction rate of specific lymphocytes.                                                 | Bru and Cardona [2010]                             |
| $BL_{thres}$               | 3500                                              | Bacilli                | Minimum threshold of bacilli to trigger the specific immune response in lymphatic organs | Deduced from experimental data (see text)          |
| $F_{blood}$                | 17                                                | mL/min                 | Volume of blood that comes out from the left ventricle of mice heart in a minute         | Estimated from Treuting et al 2012                 |
| $Q_l$                      | 1.0                                               | -                      | Fraction of blood that comes out from mice heart and enters lungs                        | Estimated (see text)                               |
| $Q_s$                      | 0.30                                              | -                      | Fraction of blood that comes out from mice heart and enters spleen                       | Estimated (see text)                               |
| $Q_{in}$                   | 0.01                                              | -                      | Fraction of blood that comes out from mice heart and enters lymph node                   | Estimated (see text)                               |

<sup>a</sup>  $I_q$  is a Bernoulli with parameter  $q$ .

<sup>b</sup>  $N_{(m,n)}(\mu,\sigma)$  is a Normal around the mean  $\mu$  and with deviation  $\sigma$ , truncated between  $m$  and  $n$ .
